# Supplementary material
Source: MDPI journal article supplement (https://www.mdpi.com/1996-1073/17/6/1374)
Supplement: s1 [file s1]

# Import

```
In [1]: from sklearn.linear_model import LinearRegression
from sklearn.metrics import r2_score, mean_squared_error
from sklearn.utils.validation import check_is_fitted
import numpy as np
from numpy.linalg import inv
import pandas as pd
from itertools import cycle, islice
import matplotlib.pyplot as plt
import random
import math
```

```
In [2]: plt.rcParams["font.family"] = "Times New Roman"
```

# Data generation

```
In [3]: num_interval = 90
length_per_interval = 100

c1 = np.linspace(-50, 50, length_per_interval*num_interval)
c2 = np.linspace(0, 5, length_per_interval*num_interval)
c3 = [5] * length_per_interval * num_interval
```

```
In [4]: x1_variation = ["low", "mid", "high"]
x1_variation_all_intervals = list(islice(cycle(x1_variation), num_interval))
x2_variation = ["low", "mid", "high"]
x2_variation_all_intervals = list(islice(cycle(np.array(x2_variation).repeat(len
```

```
In [5]: rng = np.random.default_rng(12345)

x1 = []
for x1_variation_per_interval in x1_variation_all_intervals:
    if x1_variation_per_interval == "low":
        x1.extend(rng.uniform(4.9, 5.1, length_per_interval))
    elif x1_variation_per_interval == "mid":
        x1.extend(rng.uniform(3, 7, length_per_interval))
    elif x1_variation_per_interval == "high":
        x1.extend(rng.uniform(0, 10, length_per_interval))
```

```
In [6]: rng = np.random.default_rng(222)

x2 = []
for x2_variation_per_interval in x2_variation_all_intervals:
    if x2_variation_per_interval == "low":
        x2.extend(rng.uniform(49, 51, length_per_interval))
    elif x2_variation_per_interval == "mid":
        x2.extend(rng.uniform(30, 70, length_per_interval))
    elif x2_variation_per_interval == "high":
        x2.extend(rng.uniform(0, 100, length_per_interval))
```

```
In [7]: y = c1 * x1 + c2 * x2 + c3
noise = y * rng.normal(size=length_per_interval * num_interval) * 0.05
y = y + noise
```

```
In [8]: data = pd.DataFrame({"y": y, "x1": x1, "x2": x2, "c1": c1, "c2": c2, "c3": c3})
data.head()
```

```
Out[8]:
```

|   | y           | x1       | x2        | c1         | c2       | c3 |
|---|-------------|----------|-----------|------------|----------|----|
| 0 | -249.675179 | 4.945467 | 49.754418 | -50.000000 | 0.000000 | 5  |
| 1 | -233.751821 | 4.963352 | 50.407285 | -49.988888 | 0.000556 | 5  |
| 2 | -232.712062 | 5.059473 | 50.444397 | -49.977775 | 0.001111 | 5  |
| 3 | -247.779734 | 5.035251 | 50.732941 | -49.966663 | 0.001667 | 5  |
| 4 | -247.876188 | 4.978222 | 50.791086 | -49.955551 | 0.002222 | 5  |

```
In [9]: fig, axs = plt.subplots(2, 1, figsize=(6,6), sharex=True)
axs[0].plot(data.index/length_per_interval, data.x1, label=r"$x_1$")
axs[0].plot(data.index/length_per_interval, data.x2, label=r"$x_2$")
axs[0].legend()
axs[0].set_ylabel(r"Input values $x_1$, $x_2$")

axs[1].plot(data.index/length_per_interval, data.y, label="y")
axs[1].legend()
axs[1].set_ylabel(r"Output values $y$")
axs[1].set_xlabel("Intervals")
plt.show()
```

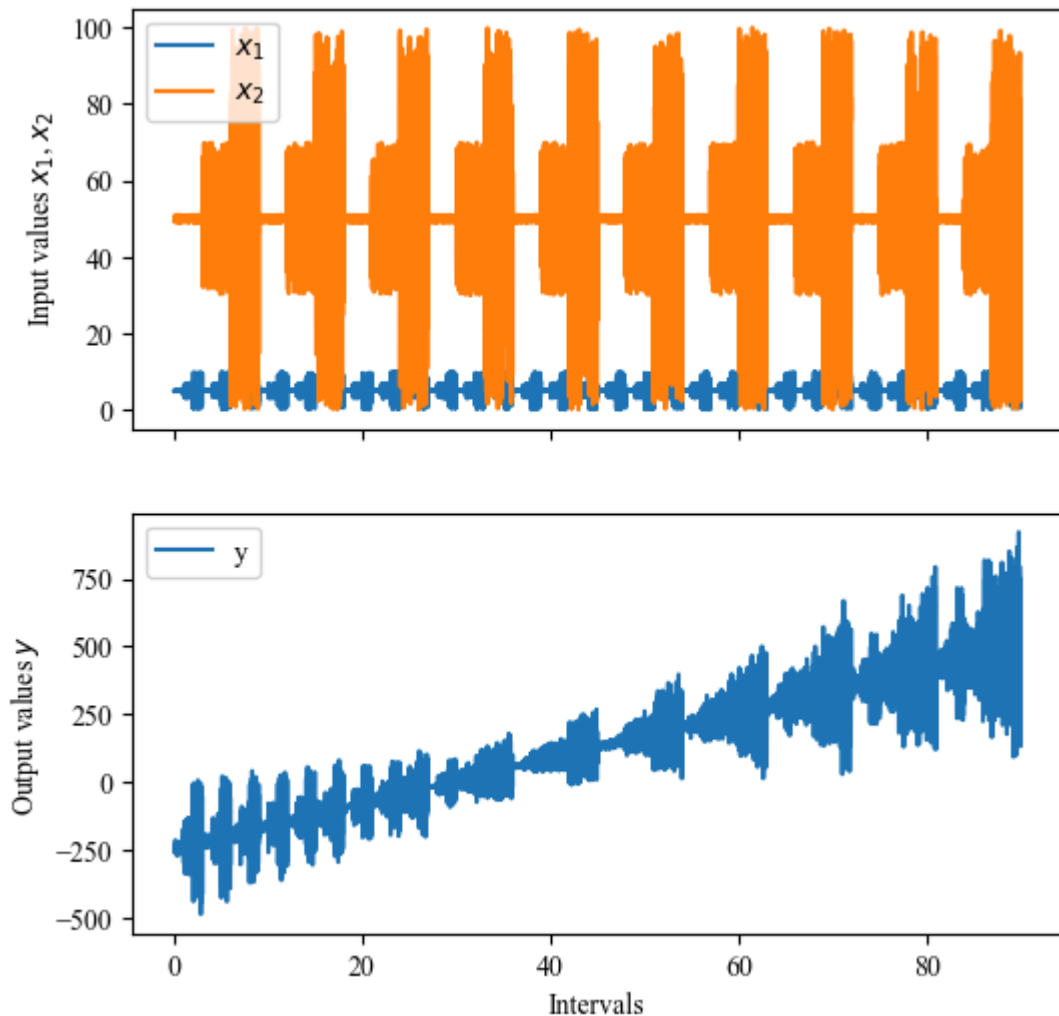

```
In [10]: x1_ref = 8
         x2_ref = 80
```

## Transfer linear regression (TLR) algorithm

```
In [11]: class TransferLinearRegression:
         def __init__(self, lambda_, fit_intercept=True, penalty_matrix=None):
             """
             :param lambda_: setting lambda_ = 0 leads to fitting the target dataset
             setting lambda_ to infinite constrains gamma = 0.
             :param fit_intercept:
             :param penalty_matrix: array-like of shape (n_features,), or if fit_intercept
             """
             self.lambda_ = lambda_
             self.fit_intercept = fit_intercept
             self.penalty_matrix = penalty_matrix

         def fit(self, X, y, base_coefficients):
             """
             Fit the model: the base coefficients will be adapted with the given X and y.
             :param X: array-like of shape (n_samples, n_features) Training data.
             :param y: array-like of shape (n_samples,) Target values.
             :param base_coefficients: array-like of shape (n_features,) Starting coefficients.
             :return: object. A adapted linear regression model.
             """
             if self.fit_intercept:
```

```

        Xs = np.concatenate([X, np.ones((len(X), 1))], axis=1)
    else:
        Xs = X

    if not self.penalty_matrix:
        Xt = np.eye(Xs.shape[1]) # a unit matrix
    else:
        Xt = np.diag(self.penalty_matrix)

    beta = base_coefficients
    Ys = y
    Y = Ys - (Xs @ beta)

    self.gamma = inv(Xs.T @ Xs + self.lambda_ * Xt.T @ Xt) @ Xs.T @ Y
    self.coef_ = beta + self.gamma
    return self

def predict(self, X):
    check_is_fitted(self, ["coef_"])
    if self.fit_intercept:
        X = np.concatenate([X, np.ones((len(X), 1))], axis=1)
    return X @ self.coef_

```

## Get initial model parameters $\beta_0$

By model fitting with the first 10% of the data.

```

In [12]: features = ["x1", "x2"]

In [13]: data_init = data.head(round(len(data)/10))
X = data_init[features]
y = data_init[["y"]]

In [14]: reg_init = LinearRegression().fit(X, y)

In [15]: model_coef = pd.DataFrame(zip(features, reg_init.coef_[0]))
model_coef = model_coef.rename(columns={0: "features", 1: "coefficients"})
model_coef.set_index("features", inplace=True)
model_coef.at["intercept", "coefficients"] = reg_init.intercept_

print("initial coefficients:")
display(model_coef)

```

initial coefficients:

| coefficients |            |
|--------------|------------|
| features     |            |
| x1           | -43.969875 |
| x2           | 0.389758   |
| intercept    | -7.090351  |

## Get the 1<sup>st</sup> term of $X_T$ (variable "penalty\_matrix")

Do plain linear regression (PLR) fitting for all intervals, to get the expected variation of  $\beta_p$  over time.

```
In [16]: fitting_results = pd.DataFrame()

for interval in range(0, num_interval):

    start_index = interval * length_per_interval
    end_index = (interval + 1) * length_per_interval
    data_this_interval = data.query(f"{start_index}<=index<={end_index}")

    X = data_this_interval[features]
    y = data_this_interval[["y"]]

    # Plain Linear regression
    reg = LinearRegression().fit(X, y)
    y_pred = reg.predict(X)
    fitting_results.loc[interval, "R2"] = r2_score(y, y_pred)
    fitting_results.loc[interval, "MSE"] = mean_squared_error(y, y_pred)

    for i in range(len(features)):
        fitting_results.loc[interval, features[i]] = reg.coef_[0][i]
        fitting_results.loc[interval, f"c{i+1}"] = data_this_interval[f"c{i+1}"]

    fitting_results.loc[interval, "intercept"] = reg.intercept_[0]
    fitting_results.loc[interval, f"c3"] = data_this_interval[f"c3"].mean()

fitting_results.eval(f"y_ref_estimated = x1 * {x1_ref} + x2 * {x2_ref} + intercept")
fitting_results.eval(f"y_ref_true = c1 * {x1_ref} + c2 * {x2_ref} + c3", inplace=True)
```

```
In [17]: fitting_results.head()
```

```
Out[17]:
```

|   | R2       | MSE        | x1         | c1         | x2        | c2       | intercept  | c3  | y |
|---|----------|------------|------------|------------|-----------|----------|------------|-----|---|
| 0 | 0.309657 | 142.723479 | -55.192206 | -49.444383 | -3.017265 | 0.027781 | 184.691631 | 5.0 |   |
| 1 | 0.952517 | 159.214352 | -46.978651 | -48.333148 | -0.009936 | 0.083343 | 5.105926   | 5.0 |   |
| 2 | 0.992186 | 147.547744 | -46.334740 | -47.221914 | -3.290412 | 0.138904 | 174.566751 | 5.0 |   |
| 3 | 0.111926 | 102.425993 | -34.515435 | -46.110679 | 0.240793  | 0.194466 | -56.800798 | 5.0 |   |
| 4 | 0.971916 | 75.159414  | -46.062276 | -44.999444 | 0.366649  | 0.250028 | 3.604023   | 5.0 |   |

```
In [18]: for feature in features:
    plt.hist(fitting_results.loc[:, feature], alpha = 0.5)
    plt.title(f"Coefficient for {feature}")
    plt.ylabel("Numer of intervals")
    plt.xticks(rotation=45)
    plt.show()

plt.hist(fitting_results.loc[:, "intercept"], alpha = 0.5)
plt.title("intercept")
plt.show()
```

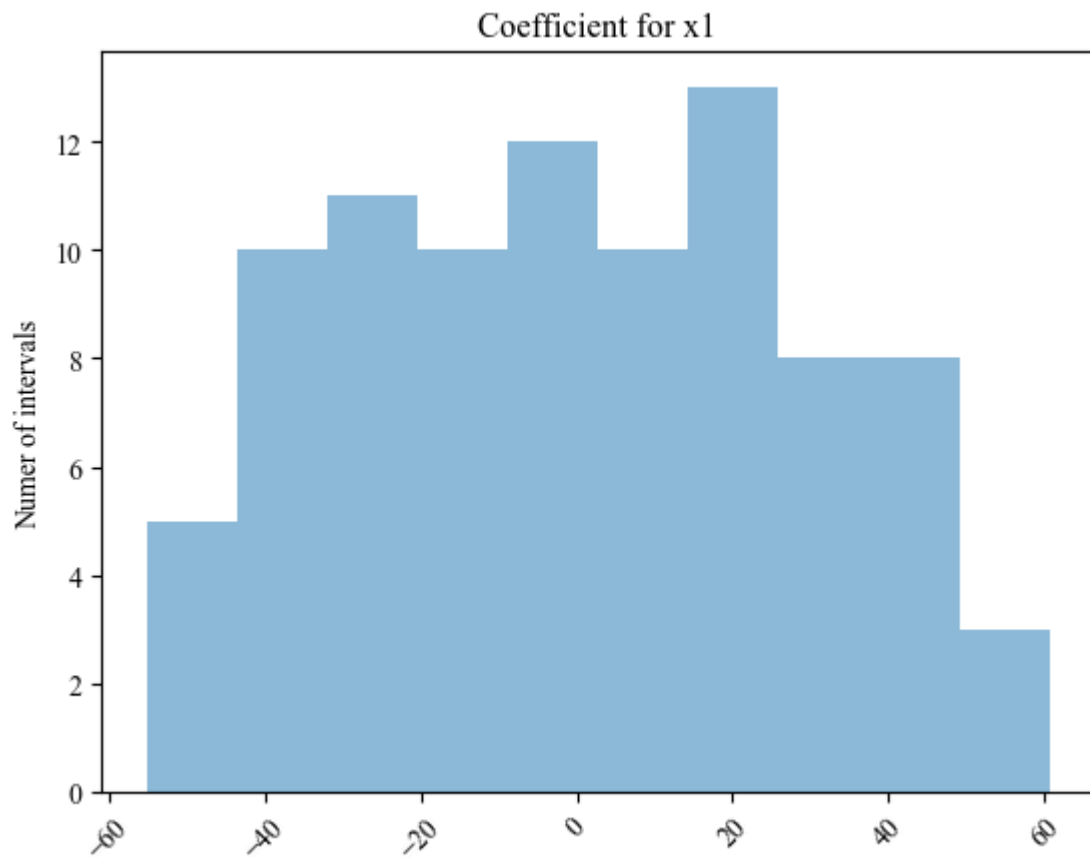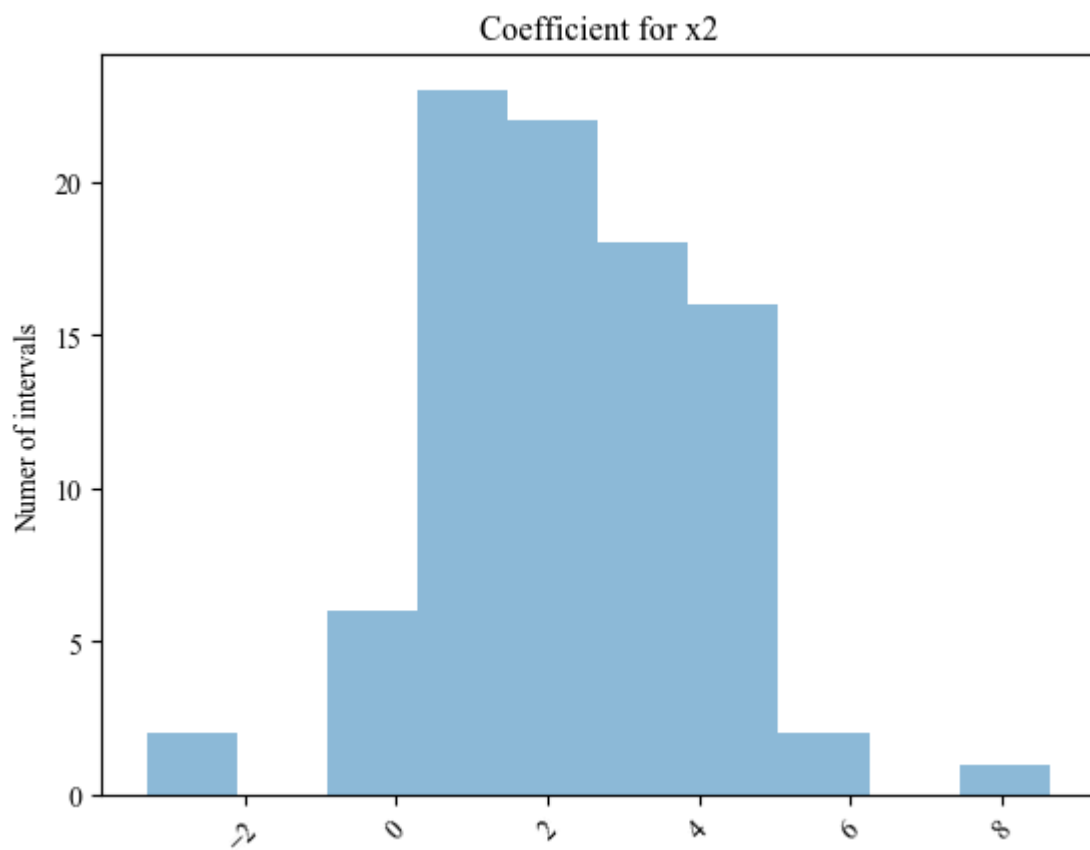

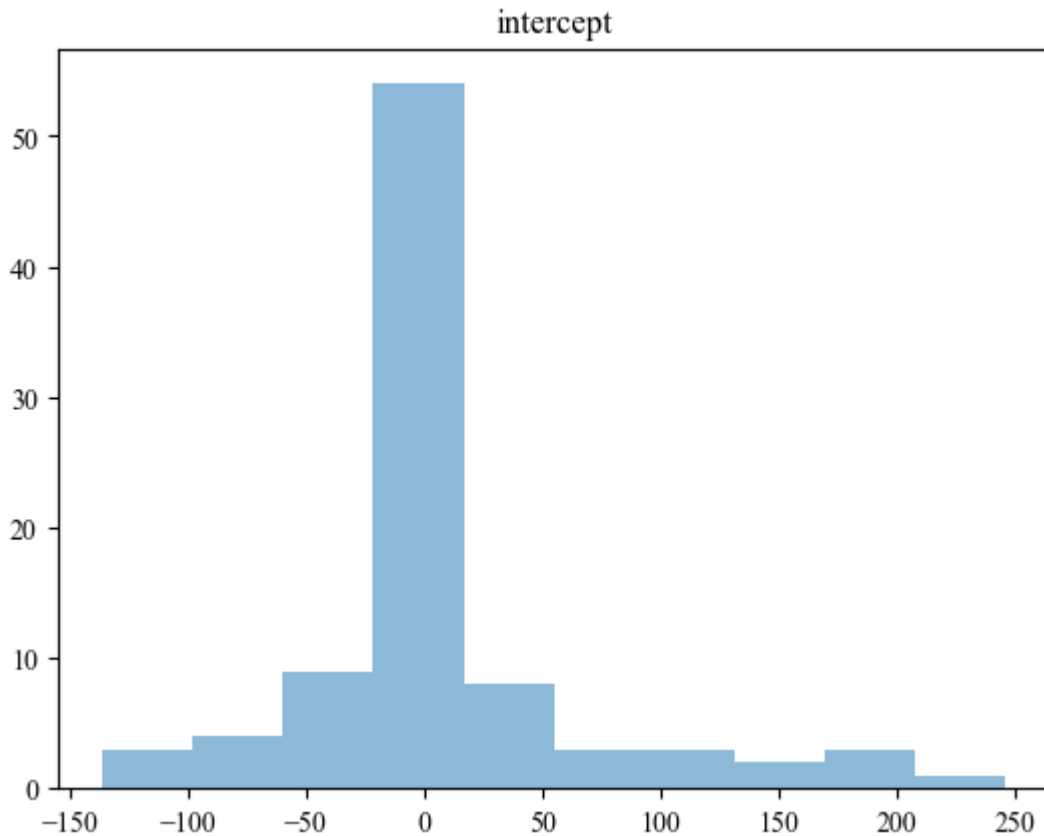

```
In [19]: penalty_matrix = []
for feature in features:
    low = np.quantile(fitting_results[feature], 0.25)
    high = np.quantile(fitting_results[feature], 0.75)
    print(f"{feature} range: {low} - {high}")
    print(f"--- Diff: {abs(low-high)}")
    penalty_matrix.append(1/abs(low-high))

low = np.quantile(fitting_results["intercept"], 0.25)
high = np.quantile(fitting_results["intercept"], 0.75)
print(f"intercept range: {low} - {high}")
print(f"--- Diff: {abs(low-high)}")
penalty_matrix.append(1/abs(low-high))

x1 range: -23.48628032344597 - 22.881966804779864
--- Diff: 46.36824712822583
x2 range: 1.0799642144401722 - 3.650035166095603
--- Diff: 2.5700709516554308
intercept range: -0.3283325213405135 - 14.718771681561734
--- Diff: 15.047104202902247
```

```
In [20]: penalty_matrix
```

```
Out[20]: [0.021566482710347445, 0.38909431638682246, 0.06645797001971467]
```

```
In [21]: fitting_results_PLR = fitting_results.copy()
```

## Select $\lambda$

```
In [22]: op_range = {"x1": [0, 10], "x2": [0, 100]}
```

```

In [23]: lambda_list = [10**(-6), 10**(-5), 10**(-4), 10**(-3), 0.01, 0.1, 1, 10, 100]

coef_dict = {}
for feature in model_coef.index:
    coef_dict[feature] = pd.DataFrame()

for interval in range(20):
    start_index = interval * length_per_interval
    end_index = (interval + 1) * length_per_interval
    data_this_interval = data.query(f"{start_index}<=index<{end_index}")

    mse_list = []

    for lambda_ in lambda_list:

        X = data_this_interval[features]

        y = data_this_interval[["y"]].squeeze()

        penalty_matrix_this_interval = penalty_matrix.copy()
        penalty_for_intercept = 1
        for i in range(len(features)):
            feature = features[i]
            q3, q1 = np.percentile(data_this_interval[feature], [75, 25])
            op_range_feature = op_range[feature]
            if len(op_range_feature) == 2:
                # little variation -> high penalty -> less flexibility
                penalty_for_variation = (op_range_feature[1] - op_range_feature[0])
                penalty_matrix_this_interval[i] = penalty_matrix[i] * (penalty_f

            penalty_for_intercept = penalty_for_intercept * (abs(q1))

        reg = TransferLinearRegression(lambda_, penalty_matrix=penalty_matrix_th

        y_pred = reg.predict(X)

        mse_list.append(mean_squared_error(y, y_pred))
        for feature, coef in zip(model_coef.index, reg.coef_):
            coef_dict[feature].loc[interval, lambda_] = coef

```

```

In [24]: fig, axes = plt.subplots(2, 2, figsize=(8,6))

ax = axes[0, 0]
coef_dict["x1"].boxplot(ax=ax)
ax.set_title(f"$c_1$")
ax.tick_params(bottom=False, labelbottom=False)

ax = axes[0, 1]
coef_dict["x2"].boxplot(ax=ax)
ax.set_title(f"$c_2$")
ax.tick_params(bottom=False, labelbottom=False)

ax = axes[1, 0]
coef_dict["intercept"].boxplot(ax=ax)
ax.set_title(f"$c_3$")
ax.set_xlabel("lambda", fontsize=12)

ax = axes[1, 1]
ax.plot(lambda_list, mse_list)

```

```

ax.set_title(f"MSE")
ax.set_xscale("symlog", linthresh=1e-6)
ax.set_xlabel("lambda", fontsize=12)
ax.tick_params(axis='x', which='major', labelsize=11, rotation=45)
ax.grid()

axes[1, 0].set_xticklabels(axes[1, 1].get_xticklabels()[1:], fontsize=11, rotation=45)
plt.tight_layout()
plt.show()

```

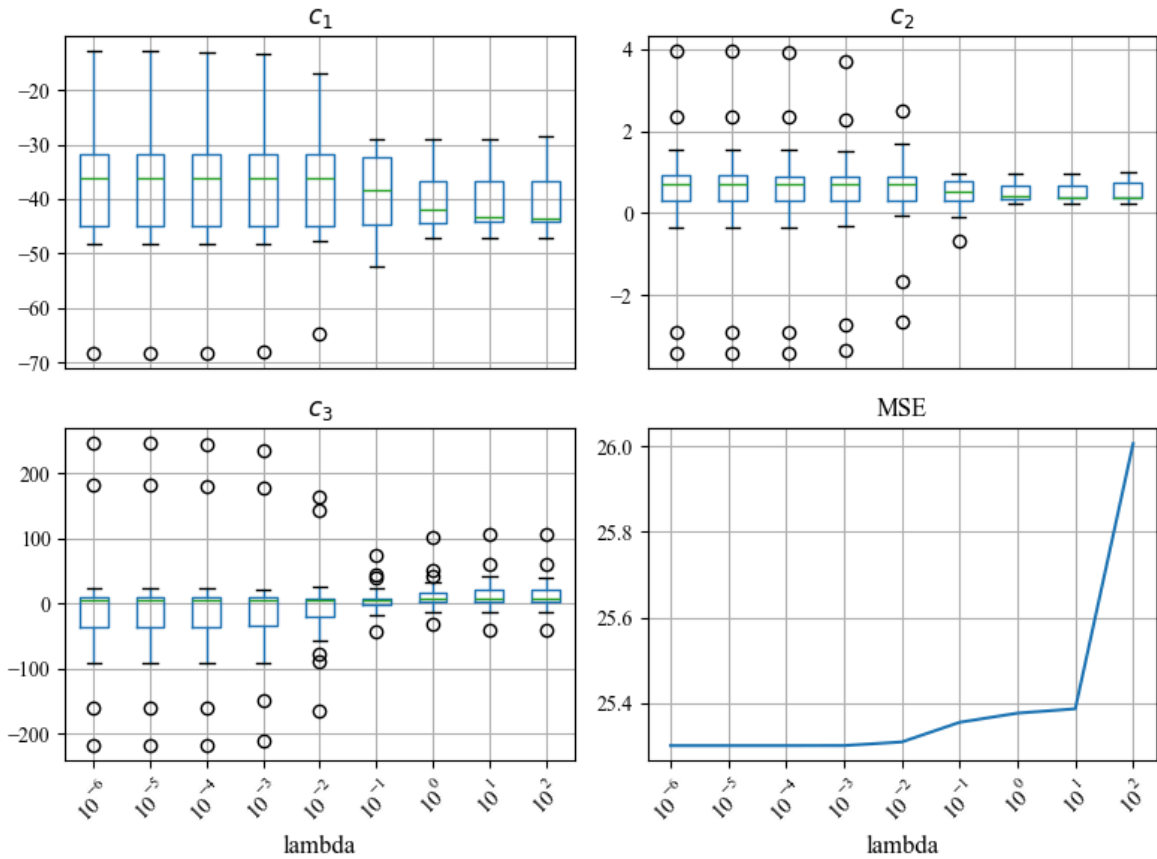

## TLR model fitting

```

In [25]: lambda_ = 10

reg = TransferLinearRegression(lambda_)
base_coefficients = model_coef.coefficients
fitting_results_TLR = pd.DataFrame()

for interval in range(0, num_interval):

    start_index = interval * length_per_interval
    end_index = (interval + 1) * length_per_interval
    data_this_interval = data.query(f"{start_index}<=index<{end_index}")

    X = data_this_interval[features]
    y = data_this_interval[["y"]].squeeze()

    # Determine penalty matrix based on the variation (Interquartile Range) of t
    # If variation is small -> the coefficient of the feature can't be well dete
    # -> need to set a high penalty matrix to avoid adaptation on that feature

    penalty_matrix_this_interval = penalty_matrix.copy()

```

```

penalty_for_intercept = 1
for i in range(len(features)):
    feature = features[i]
    q3, q1 = np.percentile(data_this_interval[feature], [75, 25])
    op_range_feature = op_range[feature]
    if len(op_range_feature) == 2:
        # little variation -> high penalty -> less flexibility
        penalty_for_variation = (op_range_feature[1]-op_range_feature[0]) /
        penalty_matrix_this_interval[i] = penalty_matrix[i] * (penalty_for_v

        penalty_for_intercept = penalty_for_intercept * (abs(q1))

reg = TransferLinearRegression(lambda_, penalty_matrix=penalty_matrix_this_i

y_pred = reg.predict(X)

fitting_results_TLR.loc[interval, "base_coef"] = str(dict(round(base_coeffic
fitting_results_TLR.loc[interval, "R2"] = r2_score(y, y_pred)
fitting_results_TLR.loc[interval, "MSE"] = mean_squared_error(y, y_pred)
fitting_results_TLR.loc[interval, "penalty_matrix"] = str([round(num, 1) for

base_coefficients = reg.coef_

for i in range(len(model_coef.index)):
    fitting_results_TLR.loc[interval, model_coef.index[i]] = reg.coef_.iloc[
    fitting_results_TLR.loc[interval, f"c{i+1}"] = data_this_interval[f"c{i+

fitting_results_TLR.eval(f"y_ref_estimated = x1 * {x1_ref} + x2 * {x2_ref} + int
fitting_results_TLR.eval(f"y_ref_true = c1 * {x1_ref} + c2 * {x2_ref} + c3", inp

```

```
In [26]: fitting_results_TLR.head()
```

| Out[26]: | base_coef                                                      | R2       | MSE        | penalty_matrix   | x1         | c1         | x2       |
|----------|----------------------------------------------------------------|----------|------------|------------------|------------|------------|----------|
| 0        | {'x1':<br>-43.969875,<br>'x2':<br>0.389758,<br>'intercept':... | 0.073831 | 149.137514 | [2.5, 44.8, 0.1] | -44.208180 | -49.449939 | 0.380575 |
| 1        | {'x1':<br>-44.20818,<br>'x2':<br>0.380575,<br>'intercept':...  | 0.953520 | 156.833579 | [0.1, 42.5, 0.1] | -47.074203 | -48.338704 | 0.382616 |
| 2        | {'x1':<br>-47.074203,<br>'x2':<br>0.382616,<br>'intercept':... | 0.991861 | 155.208051 | [0.0, 33.2, 0.1] | -46.293341 | -47.227470 | 0.368829 |
| 3        | {'x1':<br>-46.293341,<br>'x2':<br>0.368829,<br>'intercept':... | 0.139230 | 100.096331 | [2.2, 2.0, 0.1]  | -46.264180 | -46.116235 | 0.254538 |
| 4        | {'x1':<br>-46.26418,<br>'x2':<br>0.254538,<br>'intercept':...  | 0.971160 | 75.716140  | [0.1, 2.3, 0.1]  | -46.130168 | -45.005001 | 0.364032 |

## Results

```

In [27]: fig, axes = plt.subplots(2, 2, figsize=(12,6), sharex=True)

feature = "x1"
axes[0, 0].set_title(f"$c_1$")
axes[0, 0].scatter(data.index/length_per_interval, c1, label="True", alpha= 0.5,
axes[0, 0].scatter(fitting_results.index, fitting_results[feature], label=f"PLR,
axes[0, 0].scatter(fitting_results_TLR.index, fitting_results_TLR[feature], labe
axes[0, 0].legend(loc="upper left", fontsize=11)

feature = "x2"
axes[0, 1].set_title(f"$c_2$")
axes[0, 1].scatter(data.index/length_per_interval, c2, label="True", alpha= 0.5,
axes[0, 1].scatter(fitting_results.index, fitting_results[feature], label=f"PLR,
axes[0, 1].scatter(fitting_results_TLR.index, fitting_results_TLR[feature], labe
axes[0, 1].legend(loc="upper left", fontsize=11)

feature = "intercept"
axes[1, 0].set_title(f"$c_3$")
axes[1, 0].scatter(data.index/length_per_interval, c3, label="True", alpha= 0.5,
axes[1, 0].scatter(fitting_results.index, fitting_results[feature], label=f"PLR,
axes[1, 0].scatter(fitting_results_TLR.index, fitting_results_TLR[feature], labe
axes[1, 0].legend(loc="upper left", fontsize=11)

```

```

y_ref_true = c1 * x1_ref + c2 * x2_ref + c3
axes[1, 1].set_title(r"$y_{ref}$")
axes[1, 1].scatter(data.index/length_per_interval, y_ref_true, label="True", s=1)
axes[1, 1].scatter(fitting_results.index, fitting_results.y_ref_estimated, label="PLR", s=1)
axes[1, 1].scatter(fitting_results_TLR.index, fitting_results_TLR.y_ref_estimated, label="TLR", s=1)
axes[1, 1].legend(loc="upper left", fontsize=11)

axes[1, 0].set_xlabel('Intervals', fontsize=12)
axes[1, 1].set_xlabel('Intervals', fontsize=12)
plt.show()

```

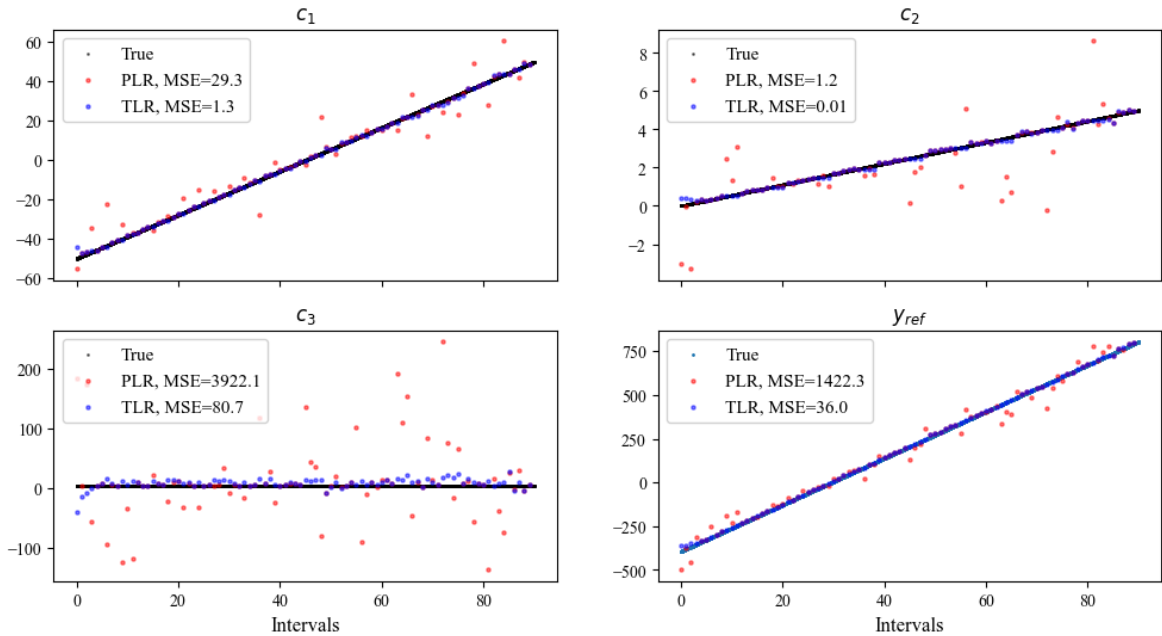

In [ ]:
